# Supplementary material
Source: Research Square preprint supplement (doi:10.21203/rs.3.rs-9162412/v1)
Supplement: Supplementary file 1 [file 56924859ba9d928491744eed.docx]

### **Supplementary 1 COREQ checklist.**

| **COnsolidated criteria for REporting Qualitative research (COREQ): 32-item checklist.** | | |
| --- | --- | --- |
| **No. Item** | **Guide questions/description** | **Reported** |
| **Domain 1: Research team and reﬂexivity** | | |
| *Personal Characteristics* | | |
| 1. Interviewer/ facilitator | Which author conducted the interview or focus group? | Enock Kebenei |
| 2. Credentials | What were the researcher’s credentials? E.g. PhD, MD | M.Sc. |
| 3. Occupation | What was their occupation at the time of the study? | Research Scientist, PhD student |
| 4. Gender | Was the researcher male or female? | Male |
| 5. Experience and training | What experience or training did the researcher have? | Conducted qualitative study before and supervised by senior researchers |
| *Relationship with participants* | | |
| 6. Relationship established | Was a relationship established prior to study commencement? | There was an established relationship with participants prior to study commencement. |
| 7. Participant knowledge of the interviewer | What did the participants know about the researcher? e.g. personal goals, reasons for doing the research | Reasons for doing the interview were known and explained at beginning of the interviews. |
| 8. Interviewer characteristics | What characteristics were reported about the interviewer/facilitator? e.g. Bias, assumptions, reasons and interests in the research topic | Participants were told that the interviewer is interested in their EC experiences at the time of COVID-19 pandemic, for his PhD project. |
| **Domain 2: study design** | | |
| *Theoretical framework* | | |
| 9. Methodological orientation and Theory | What methodological orientation was stated to underpin the study? e.g. grounded theory, discourse analysis, ethnography, phenomenology, content analysis | Framework analysis method applying both deductive and inductive approaches was stated to underpin this research |
| *Participant selection* | | |
| 10. Sampling | How were participants selected? e.g. purposive, convenience, consecutive, snowball | Purposive and snowballing sampling methods were adopted. |
| 11. Method of approach | How were participants approached? e.g. face-to-face, telephone, mail, email | Participants were approached through emails and face-to-face meetings where applicable. EC representatives received oral and written instructions about the study and recruitment process. |
| 12. Sample size | How many participants were in the study? | *n* = 16 |
| 13. Non-participation | How many people refused to participate or dropped out? Reasons? | Of those consenting to participate, none refused or dropped out. |
| *Setting* |  |  |
| 14. Setting of data collection | Where was the data collected? e.g. home, clinic, workplace | 5 virtually via MS Teams, 1 at clinic, and 10 at workplace. |
| 15. Presence of non-participants | Was anyone else present besides the participants and researchers? | No. |
| 16. Description of sample | What are the important characteristics of the sample? e.g. demographic data, date | Socio-demographic characteristics of participants are reported in Table 1. |
| *Data collection* |  |  |
| 17. Interview guide | Were questions, prompts, guides provided by the authors? Was it pilot tested? | The interview guide is provided (Supplement 2). It was pilot tested within the corresponding author’s working place (by two colleagues). |
| 18. Repeat interviews | Were repeat interviews carried out? If yes, how many? | No. |
| 19. Audio/visual recording | Did the research use audio or visual recording to collect the data? | Audio recording was used. |
| 20. Field notes | Were ﬁeld notes made during and/or after the interview or focus group? | Field notes were taken during the interviews. |
| 21. Duration | What was the duration of the interviews or focus group? | M = 35 minutes, range: 22 minutes to 43 minutes. |
| 22. Data saturation | Was data saturation discussed? | Yes, data saturation was reached after 16 interviews. The 16 EC representatives provided rich and meaningful descriptions, with the dialogue revealing in-depth experiences that adequately corresponded to the research question. There was no need for further interviews. |
| 23. Transcripts returned | Were transcripts returned to participants for comment and/or correction? | No. |
| **Domain 3: analysis and ﬁndings** | | |
| *Data analysis* |  |  |
| 24. Number of data coders | How many data coders coded the data? | 2 research scientists |
| 25. Description of the coding tree | Did authors provide a description of the coding tree? | The five phases of the framework analysis method have been described in the methods section and illustrated in Figure 1. An example of the coding process is shown in Figure 2. |
| 26. Derivation of themes | Were themes identiﬁed in advance or derived from the data? | Themes were derived deductively from guides and literature review as well as inductively from the data. |
| 27. Software | What software, if applicable, was used to manage the data? | NVIVO version 12 software to code and enter data in unique files |
| 28. Participant checking | Did participants provide feedback on the ﬁndings? | No. |
| *Reporting* |  |  |
| 29. Quotations presented | Were participant quotations presented to illustrate the themes/ﬁndings? Was each quotation identiﬁed (e.g. ID)? | Yes, quotations including the ID of the participants are reported. |
| 30. Data and ﬁndings consistent | Was there consistency between the data presented and the ﬁndings? | Yes |
| 31. Clarity of major themes | Were major themes clearly presented in the ﬁndings? | Yes, all themes relating to the research question are presented. |
| 32. Clarity of minor themes | Is there a description of diverse cases/discussion minor themes? | Yes, minor themes are discussed. |
| ***Note****.* Tong A, Sainsbury P, Craig J. Consolidated criteria for reporting qualitative research (COREQ): a 32-item checklist for interviews and focus groups. International Journal for Quality in Health Care. 2007. Volume 19, Number 6: pp. 349 – 357. | | |
