# Supplementary material
Source: Research Square preprint supplement (doi:10.21203/rs.3.rs-9162412/v1)
Supplement: Supplementary file 2 [file 5f7e80d253eca71e668028cf.docx]

### **Supplementary 2:** Interview guide.

**Title of the study:** Evaluating the Relationship between Ethics Approval Timelines and Quality of Clinical Trials During Public Health Emergencies in Kenya

**Qualitative objective (3):** To assess the operational procedures and adaptations of selected ethics review committees in Kenya during the COVID-19 pandemic (April 2020-March 2021).

**Interviewer’s welcome, introduction and instructions to respondent/participant**

| Hello, and thank you for taking the time to speak with me today. My name is [Your Name], and I am a PhD candidate and lead investigator of this study which is part of my PhD thesis entitled “Evaluation of Research Integrity Practices in the Oversight, Implementation and Publication of Medical Research During Public Health Emergencies” being done at Maastricht University, The Netherlands, Faculty of Health, Medicine and Life Sciences (FHML). Our study aims to understand the prevailing operational conditions of selected ethics review committees during the COVID-19 pandemic and to understand adaptations in the post-pandemic era in Kenya. We are interested in learning about your experiences, thoughts, and feelings about being involved in clinical trials review during the COVID-19 pandemic. By hearing from you, we hope to identify ways to improve the process for future participants. Your insights will be valuable in helping us understand what works well and where there might be room for improvement whenever accelerated reviews are needed. Please know that your participation in this interview is completely voluntary, and you are free to withdraw at any time. Everything you share will be kept confidential, and your name or any identifying information will not be used in any reports or publications that will form part of my PhD thesis. Results may be published by the end of the year 2025. With your permission, I would like to record our conversation so I can accurately capture your thoughts. The recording will only be used for research purposes and will be securely stored. This interview will take approximately 30-45 minutes. |
| --- |

**Section A: Socio-Demographic Characteristics**

*[To be completed on a one-on-one basis, immediately after consent is obtained]*

| **Participant information** | **Response** |
| --- | --- |
| **Age** (20-30, 31-40, 41-50, 51 and above) |  |
| **Gender:** |  |
| **Highest level of education completed** |  |
| **Role in the ISERC** (Research Administrator, Committee Secretary, Reviewer, Committee Member) |  |
| **Years of experience in ethics review** |  |

**Section B: Guiding questions**

1. **Administrative and Logistical Set Up of ECs in Public Health Emergencies**
2. Reflecting on the COVID-19 pandemic period, please share with me any *administrative adjustments* that your committee made to operate within the protocols that were set to combat the spread of the coronavirus disease? (**Prompt**: committee composition, committee governance and leadership and structure, availability of technical expertise to review protocols, availability and accessibility of ERC secretariat)
3. During the pandemic, share with me any *logistical adjustments* made to the committee operations [**Prompts**: Documentation and record-keeping, review meeting schedules, post-approval monitoring adjustments, physical infrastructure, finances, and ICT systems)
4. Please share with me any *capacity building efforts* that were initiated during the COVID-19 pandemic to address pandemic-specific or emergency situations
5. **Operational Adjustments of Ethics Committees Beyond the Pandemic**
6. Looking back to the changes that were made as a result of COVID-19 pandemic, please share with me the adjustments that were retained to date (Why were they retained?)
7. If some of the adjustments were dropped, which ones and why were they abandoned?
8. **Review Processes during Public Health Emergencies**
9. During the COVID-19 period, please describe to me the way non-COVID research protocols were handled [**Prompt**: deprioritizing non-COVID protocols, usual review timelines followed]
10. During the COVID-19 period, can you tell me about any changes made in your committee to accommodate quick turn-around review of urgent COVID-19 clinical trial protocols.  [**Prompt**: activation of expedited review mechanisms, additional clinical trial reviewers co-opted, compensation of reviewers, joint/parallel reviews]
11. In your opinion, what was the quality of COVID-19 research that you reviewed during the pandemic [**Prompts**: scientific rigor, ethical soundness, relevance and innovation, impact]
12. **Regulatory and Policy Environment in Emergency Situations**
13. Prior to the COVID-19 pandemic, were there any institutional guidelines and procedures for review of clinical trials during public health emergencies? [**Prompts:** If yes, were they activated and were they helpful? If no, are there plans to have procedures to ensure continuity of research oversight during such periods and what are they?].
14. During the COVID-19 pandemic, can you tell me more about any temporary or emergency guidance issued to support oversight of urgent clinical research at the ERC level? [**Prompts**: new SOPs, guidelines, or policies developed]
15. Please describe to me any global, regional, national, or institutional policy changes that affected operations of your REC during the COVID-19 pandemic [**Probe**: How?]
16. Considering the ethics standards at different levels i.e. international and local, describe to me any challenges that you may have experienced in harmonizing such standards during the COVID-19 pandemic.
17. **Future Directions of Ethics Committees in the Post-Pandemic Era**
18. Reflecting on your entire journey as a [research administrator/reviewer], what aspects of the review processes do you think could be improved to enhance scientific and ethics rigor of research under accelerated review timelines? **[Probes:** Why and by whom?]
19. What recommendations do you have for improving ethics committee operations during future public health emergencies?
20. Do you have anything else you wish to share with us relating to the operational procedures of ERCs during future public health emergencies?

***Thank you for your participation***.
